# Supplementary material
Source: Royal Society of Chemistry journal article supplement (doi:10.1039/d5fb00954e)
Supplement: d5fb00954e1.pdf [file d5fb00954e1.pdf]

### Supplementary Material

#### UPCYCLING OF TOMATO BY-PRODUCTS IN FOOD: QUALITY IMPROVEMENTS AND LIFE CYCLE ASSESSMENT

**Table S1.** Sensory characteristics of raw pasta samples with and without TPS

| Sample  | Color                    | Odor                     | Homogeneity              | Appearance               | Breaking resistance      | Overall quality            |
|---------|--------------------------|--------------------------|--------------------------|--------------------------|--------------------------|----------------------------|
| Ctrl    | 9.00 ± 0.00 <sup>a</sup> | 9.00 ± 0.00 <sup>a</sup> | 8.83 ± 0.26 <sup>a</sup> | 8.83 ± 0.26 <sup>a</sup> | 9.00 ± 0.00 <sup>a</sup> | 9.00 ± 0.00 <sup>a</sup>   |
| Pasta-L | 8.83 ± 0.26 <sup>a</sup> | 8.92 ± 0.20 <sup>a</sup> | 8.83 ± 0.26 <sup>a</sup> | 8.80 ± 0.27 <sup>a</sup> | 6.17 ± 0.26 <sup>b</sup> | 8.33 ± 0.26 <sup>b</sup>   |
| Pasta-M | 8.83 ± 0.26 <sup>a</sup> | 8.92 ± 0.20 <sup>a</sup> | 8.83 ± 0.26 <sup>a</sup> | 8.80 ± 0.27 <sup>a</sup> | 5.25 ± 0.27 <sup>c</sup> | 7.83 ± 0.26 <sup>b,c</sup> |
| Pasta-H | 8.83 ± 0.26 <sup>a</sup> | 8.92 ± 0.20 <sup>a</sup> | 8.83 ± 0.26 <sup>a</sup> | 8.80 ± 0.27 <sup>a</sup> | 5.07 ± 0.19 <sup>c</sup> | 7.58 ± 0.38 <sup>c</sup>   |

Data are reported as means ± SD. Data in each column with different superscript letter are statistically different ( $p < 0.05$ ).

**Table S2.** Sensory characteristics of cooked pasta samples with and without TPS

| Sample  | Color                    | Odor                     | Elasticity               | Bulkiness                | Stickiness               | Firmness                 | Grittiness               | Taste                    | Overall quality          |
|---------|--------------------------|--------------------------|--------------------------|--------------------------|--------------------------|--------------------------|--------------------------|--------------------------|--------------------------|
| Ctrl    | 9.00 ± 0.00 <sup>a</sup> | 9.00 ± 0.00 <sup>a</sup> | 9.00 ± 0.00 <sup>a</sup> | 8.83 ± 0.26 <sup>a</sup> | 9.00 ± 0.00 <sup>a</sup> |
| Pasta-L | 8.25 ± 0.27 <sup>b</sup> | 8.92 ± 0.20 <sup>a</sup> | 7.67 ± 0.26 <sup>b</sup> | 8.80 ± 0.27 <sup>a</sup> | 8.25 ± 0.27 <sup>b</sup> | 8.42 ± 0.20 <sup>b</sup> | 6.75 ± 0.27 <sup>b</sup> | 7.50 ± 0.32 <sup>b</sup> | 7.25 ± 0.27 <sup>b</sup> |
| Pasta-M | 8.25 ± 0.27 <sup>b</sup> | 8.92 ± 0.20 <sup>a</sup> | 7.33 ± 0.26 <sup>b</sup> | 8.80 ± 0.27 <sup>a</sup> | 7.75 ± 0.27 <sup>c</sup> | 7.67 ± 0.26 <sup>c</sup> | 6.33 ± 0.27 <sup>b</sup> | 6.75 ± 0.26 <sup>c</sup> | 6.67 ± 0.26 <sup>c</sup> |
| Pasta-H | 8.25 ± 0.27 <sup>b</sup> | 8.92 ± 0.20 <sup>a</sup> | 7.25 ± 0.27 <sup>b</sup> | 8.80 ± 0.27 <sup>a</sup> | 7.75 ± 0.27 <sup>c</sup> | 7.67 ± 0.26 <sup>c</sup> | 5.83 ± 0.26 <sup>c</sup> | 6.00 ± 0.32 <sup>d</sup> | 5.83 ± 0.26 <sup>d</sup> |

*Data are reported as means ± SD. Data in each column with different superscript letter are statistically different ( $p < 0.05$ ).*

**Table S3.** Sensory  
samples with and without TPS

characteristics of raw gnocchi

| <b>Sample</b> | <b>Color</b>             | <b>Odor</b>              | <b>Appearance-<br/>Homogeneity</b> | <b>Breaking<br/>resistance</b> | <b>Overall<br/>quality</b> |
|---------------|--------------------------|--------------------------|------------------------------------|--------------------------------|----------------------------|
| Ctrl          | 9.00 ± 0.00 <sup>a</sup> | 9.00 ± 0.00 <sup>a</sup> | 9.00 ± 0.00 <sup>a</sup>           | 9.00 ± 0.00 <sup>a</sup>       | 9.00 ± 0.00 <sup>a</sup>   |
| Gnocchi-L     | 8.80 ± 0.27 <sup>a</sup> | 8.80 ± 0.27 <sup>a</sup> | 8.80 ± 0.27 <sup>a</sup>           | 6.17 ± 0.26 <sup>b</sup>       | 8.80 ± 0.27 <sup>a</sup>   |
| Gnocchi -M    | 8.80 ± 0.27 <sup>a</sup> | 8.80 ± 0.27 <sup>a</sup> | 8.80 ± 0.27 <sup>a</sup>           | 5.25 ± 0.27 <sup>c</sup>       | 8.80 ± 0.27 <sup>a</sup>   |
| Gnocchi -H    | 8.92 ± 0.20 <sup>a</sup> | 8.83 ± 0.20 <sup>a</sup> | 8.83 ± 0.26 <sup>a</sup>           | 5.07 ± 0.19 <sup>c</sup>       | 7.75 ± 0.27 <sup>b</sup>   |

*Data are reported as means ± SD. Data in each column with different superscript letter are statistically different ( $p < 0.05$ ).*

**Table S4.** Sensory  
gnocchi samples with and

characteristics of cooked  
without TPS

| <b>Sample</b> | <b>Color</b>             | <b>Odor</b>              | <b>Stickiness</b>        | <b>Grittiness</b>        | <b>Taste</b>             | <b>Overall quality</b>   |
|---------------|--------------------------|--------------------------|--------------------------|--------------------------|--------------------------|--------------------------|
| Ctrl          | 9.00 ± 0.00 <sup>a</sup> |
| Pasta-L       | 8.80 ± 0.27 <sup>a</sup> | 8.92 ± 0.20 <sup>a</sup> | 8.25 ± 0.27 <sup>b</sup> | 6.75 ± 0.27 <sup>b</sup> | 7.50 ± 0.32 <sup>b</sup> | 7.25 ± 0.27 <sup>b</sup> |
| Pasta-M       | 8.80 ± 0.27 <sup>a</sup> | 8.92 ± 0.20 <sup>a</sup> | 7.75 ± 0.27 <sup>c</sup> | 6.33 ± 0.27 <sup>b</sup> | 6.75 ± 0.26 <sup>c</sup> | 6.67 ± 0.26 <sup>c</sup> |
| Pasta-H       | 8.92 ± 0.20 <sup>a</sup> | 8.92 ± 0.20 <sup>a</sup> | 7.75 ± 0.27 <sup>c</sup> | 5.83 ± 0.26 <sup>c</sup> | 6.00 ± 0.32 <sup>d</sup> | 5.83 ± 0.26 <sup>d</sup> |

*Data are reported as means ± SD. Data in each column with different superscript letter are statistically different ( $p < 0.05$ ).*

**Table S5.** Total Polyphenol Content (TPC) and Total Flavonoid Content (TFC) of pasta samples with and without TPS

| Sample  | TPC<br>[mg GAE/g dw]       | TFC<br>[mg QE/g dw]      |
|---------|----------------------------|--------------------------|
| Ctrl    | 0.404 ± 0.101 <sup>a</sup> | 0.25 ± 0.03 <sup>a</sup> |
| Pasta-L | 0.459 ± 0.126 <sup>a</sup> | 0.31 ± 0.05 <sup>a</sup> |
| Pasta-M | 0.499 ± 0.078 <sup>a</sup> | 0.35 ± 0.08 <sup>a</sup> |
| Pasta-H | 0.505 ± 0.085 <sup>a</sup> | 0.36 ± 0.04 <sup>a</sup> |

*Data are reported as means ± SD. Data in each column with different superscript letter are statistically different ( $p < 0.05$ ).*

**Table S6.** Total Polyphenol Content (TPC) and Total Flavonoid Content (TFC) of gnocchi samples with and without TPS

| Sample    | TPC<br>[mg GAE/g dw]       | TFC<br>[mg QE/g dw]      |
|-----------|----------------------------|--------------------------|
| Ctrl      | 0.407 ± 0.053 <sup>a</sup> | 0.28 ± 0.03 <sup>b</sup> |
| Gnocchi-L | 0.479 ± 0.076 <sup>a</sup> | 0.55 ± 0.08 <sup>a</sup> |
| Gnocchi-M | 0.503 ± 0.049 <sup>a</sup> | 0.58 ± 0.07 <sup>a</sup> |
| Gnocchi-H | 0.570 ± 0.031 <sup>a</sup> | 0.62 ± 0.10 <sup>a</sup> |

*Data are reported as means ± SD. Data in each column with different superscript letter are statistically different ( $p < 0.05$ ).*

**Table S7.** Ingredients (g/1 kg pasta) used for pasta preparation, along with the corresponding sources of environmental impact data.

| Ingredient                  | Value CTRL | Value Pasta-L | Value Pasta-M | Value Pasta-H | Unit | Source               | Name of the data used in the database                                                             | Reference              |
|-----------------------------|------------|---------------|---------------|---------------|------|----------------------|---------------------------------------------------------------------------------------------------|------------------------|
| Semolina                    | 690        | 535.01        | 522.67        | 510.89        | g/kg | University of Foggia |                                                                                                   | Environdec, (2022)     |
| Water                       | 180        | 139.56        | 136.35        | 133.27        | g/kg | University of Foggia | Tap water {Europe without Switzerland}  tap water production, conventional treatment   Cut-off, S | Ecoinvent (2024)       |
| Fresh Egg                   | 130        | 100.80        | 98.47         | 96.25         | g/kg | University of Foggia |                                                                                                   | Leinonen et al. (2012) |
| CMC                         | 0          | 0.43          | 0.44          | 0.44          | g/kg | University of Foggia | Carboxymethyl cellulose, powdered {RoW} production   Cut-off, S                                   | Ecoinvent (2024)       |
| By-product                  | 0          | 147.32        | 159.07        | 170.29        | g/kg | University of Foggia | Electricity, medium voltage {IT} market for   Cut-off, S                                          | Ecoinvent (2024)       |
| Water to hydrate by-product | 0          | 76.86         | 82.99         | 88.85         | g/kg | University of Foggia | Tap water {Europe without Switzerland}  tap water production, conventional treatment   Cut-off, S | Ecoinvent (2024)       |

**Table S8.** Ingredients (g/1 kg gnocchi) used for gnocchi preparation, along with the corresponding sources of environmental impact data.

| <b>Ingredient</b>    | <b>Value CTRL</b> | <b>Value Gnocchi-L</b> | <b>Value Gnocchi-M</b> | <b>Value Gnocchi-H</b> | <b>Unit</b> | <b>Source</b>        | <b>Name of the data used in the database</b>                                                      | <b>Reference</b>   |
|----------------------|-------------------|------------------------|------------------------|------------------------|-------------|----------------------|---------------------------------------------------------------------------------------------------|--------------------|
| <b>Semolina</b>      | 258,36            | 186.94                 | 177.67                 | 183.09                 | g/kg        | University of Foggia |                                                                                                   | Environdec, (2022) |
| <b>Water</b>         | 574,14            | 415.42                 | 394.83                 | 406.88                 | g/kg        | University of Foggia | Tap water {Europe without Switzerland}  tap water production, conventional treatment   Cut-off, S | Ecoinvent (2024)   |
| <b>Potato flakes</b> | 63.15             | 45.70                  | 43.43                  | 44.76                  | g/kg        | University of Foggia | Potato {RoW}  potato production   Cut-off, S                                                      | Ecoinvent (2024)   |
| <b>Potato starch</b> | 91.86             | 66.47                  | 63.17                  | 65.10                  | g/kg        | University of Foggia | Potato starch {RoW}  potato starch production   Cut-off, S                                        | Ecoinvent (2024)   |
| <b>Salt</b>          | 7.18              | 5.19                   | 4.94                   | 5.06                   | g/kg        | University of Foggia | Salt {GLO}  market for salt   Cut-off, S                                                          | Ecoinvent (2024)   |
| <b>Lactic acid</b>   | 4.30              | 3.12                   | 2.96                   | 3.05                   | g/kg        | University of Foggia | Lactic acid {RoW}  lactic acid production   Cut-off, S                                            | Ecoinvent (2024)   |
| <b>Sorbic acid</b>   | 0.72              | 0.52                   | 0.49                   | 0.51                   | g/kg        | University of Foggia | Citric acid {RoW}  citric acid production   Cut-off, S                                            | Ecoinvent (2024)   |

|                                    |      |        |        |        |      |                      |                                                                                                   |                  |
|------------------------------------|------|--------|--------|--------|------|----------------------|---------------------------------------------------------------------------------------------------|------------------|
| <b>Safflower</b>                   | 0.29 | 0.21   | 0.20   | 0.20   | g/kg | University of Foggia | Sunflower seed {RoW}  sunflower production   Cut-off, S                                           | Ecoinvent (2024) |
| <b>CMC</b>                         | 0    | 2.49   | 2.37   | 2.44   | g/kg | University of Foggia | Carboxymethyl cellulose, powdered {RoW} production   Cut-off, S                                   | Ecoinvent (2024) |
| <b>By-product</b>                  | 0    | 125.63 | 142.14 | 146.48 | g/kg | University of Foggia | Electricity, medium voltage {IT} market for   Cut-off, S                                          | Ecoinvent (2024) |
| <b>Water to hydrate by-product</b> | 0    | 148.31 | 167.80 | 142.41 | g/kg | University of Foggia | Tap water {Europe without Switzerland}  tap water production, conventional treatment   Cut-off, S | Ecoinvent (2024) |

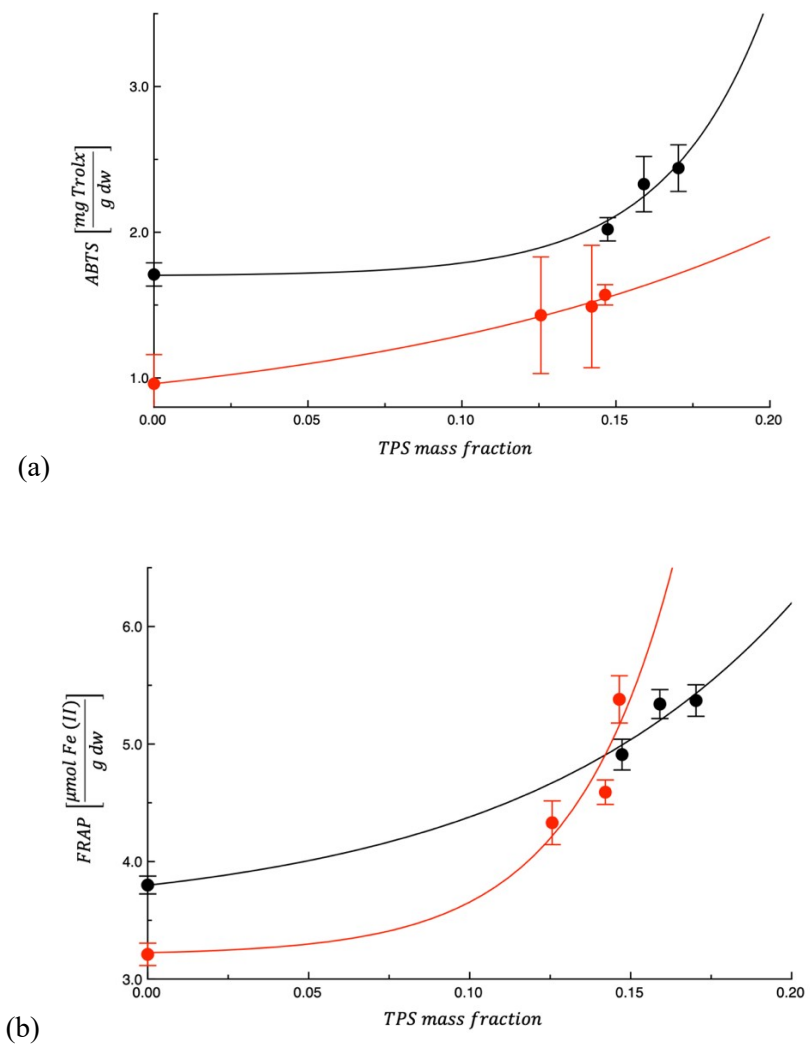

**Figure S1.** ABTS (a) and FRAP (b) values for gnocchi and pasta samples as function of TPS mass fraction. ● Gnocchi, ● Pasta, — Gnocchi, — Pasta. The curves shown in the figure are intended solely to highlight the trend of the data.

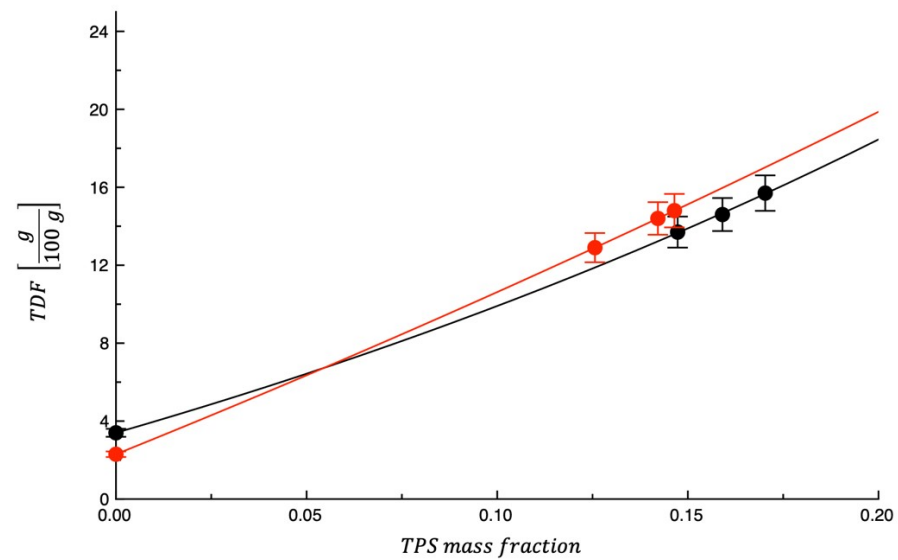

**Figure S2.** TDF values for gnocchi and pasta samples as function of TPS mass fraction. ● Gnocchi, ● Pasta, — Gnocchi, — Pasta. The curves shown in the figure are intended solely to highlight the trend of the data.

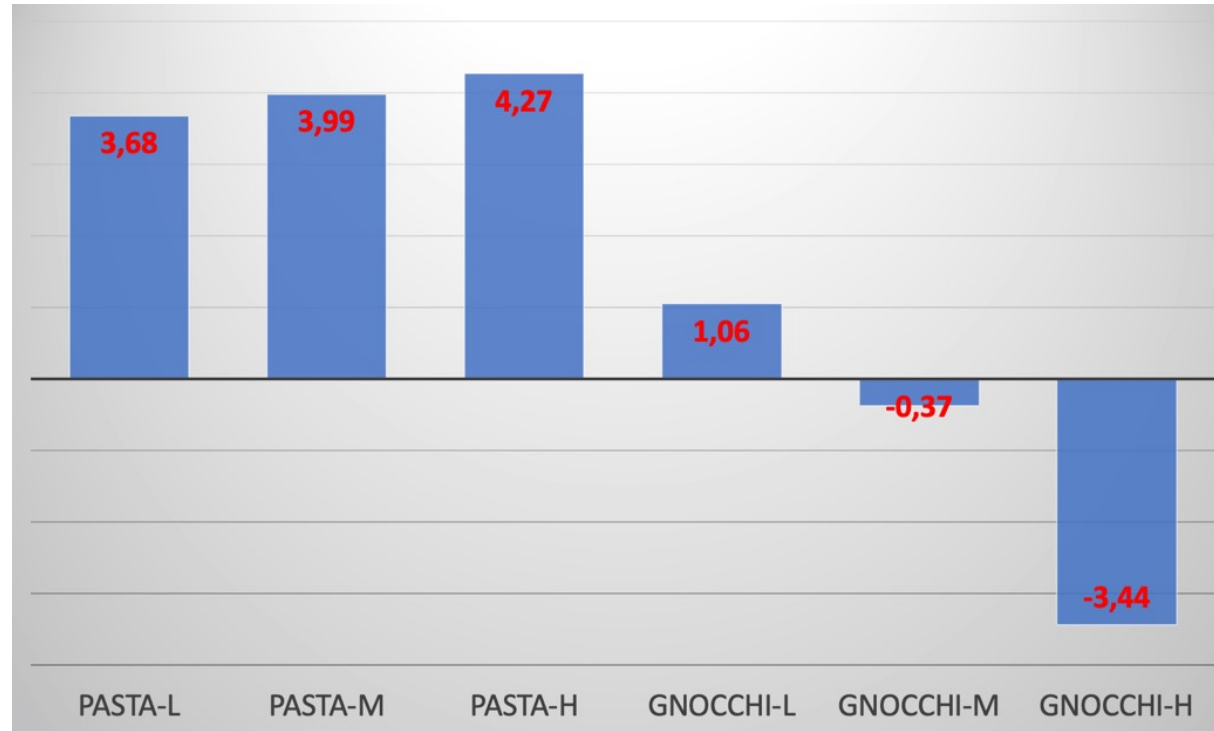

**Figure S3.** Values of percentage normalized environmental impact calculated using the Equation (1) for pasta and gnocchi samples.

## References

Ecoinvent, 2024. Ecoinvent database version 3.

Environdec, 2022. Environmental Product Declaration: Pasta di Semola Agnesi. <https://api.environdec.com/api/v1/EPDLibrary/Files/f53689a9-89dc-405c-9b45-08da3d5507cb/Data>

I. Leinonen, A.G. Williams, J. Wiseman, J. Guy and I. Kyriazakis, I. Predicting the environmental impacts of chicken systems in the United Kingdom through a life cycle assessment: Broiler production systems. *Poultry Sci.* 2012, 91(1), 8-25.
